# Supplementary material
Source: PubMed Central journal article supplement (PMC3687203)

Supplementary figure 1: Showing how the papers were identified for inclusion in the review

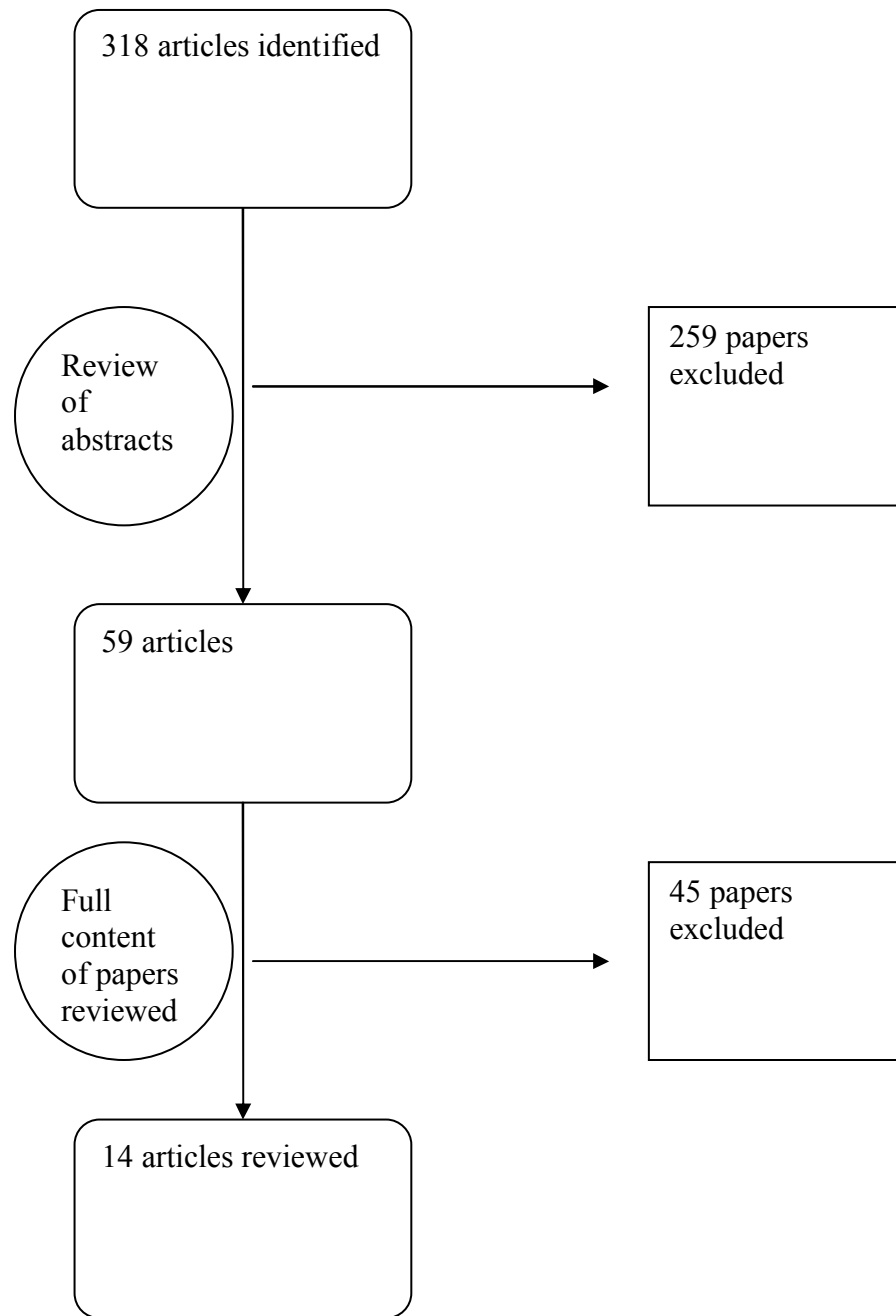

Supplement: NIHMS53677-supplement-01.pdf [file NIHMS53677-supplement-01.pdf]
